# Supplementary material for: Characteristics of successfully implemented telemedical applications
Source: Implement Sci. 2007 Jul 27;2:25. doi: 10.1186/1748-5908-2-25 (PMC1988806; doi:10.1186/1748-5908-2-25)
Supplement: Additional file 1 — Appendix. The data provided represent all the articles discussed [file 1748-5908-2-25-S1.pdf]

| Reference                  | Local healthcare service delivery problems are clearly stated                                                                | Telemedicine is seen as a benefit                                                                  | Telemedicine is seen as a solution to political and medical issues              | There is collaboration between promoters and users                                                                                       | Issues regarding organizational and technological arrangements are addressed                                                                                 | The future operation of the service is considered                                                                                       | Location (L), Participants (P), Type of study (T)                                                                                                 |
|----------------------------|------------------------------------------------------------------------------------------------------------------------------|----------------------------------------------------------------------------------------------------|---------------------------------------------------------------------------------|------------------------------------------------------------------------------------------------------------------------------------------|--------------------------------------------------------------------------------------------------------------------------------------------------------------|-----------------------------------------------------------------------------------------------------------------------------------------|---------------------------------------------------------------------------------------------------------------------------------------------------|
| LaMonte et al. (2003)[26]  | Under use of intravenous thrombolytic therapy in areas without local consulting stroke specialist.                           | Audio-video link; increase the number of patients receiving intravenous thrombolytic therapy.      | Improving treatment for acute stroke patients out of university medical centre. | Conversations between actors involved; planning meetings accomplished; training sessions and ICT support arranged; evaluation performed. | Telemedical application emanated from a traditional telephone consultation service; routines for training sessions established; guidelines for use prepared. | Further studies on outcome, quality, and effect. Lack of funding and reimbursement mechanisms will limit the development in this field. | L: Baltimore, USA. University medical centre and community hospital.<br>P: 50 telemedicine/telephone consultations.<br>T: Description of service. |
| Gray et al. (1998) [27]    | Need for increased information and support to families of high risk newborns during hospitalization and following discharge. | Baby-CareLink; gives access to personal information from any computer with a standard web browser. | Improve service provided by the hospital to families of high risk newborns.     | Conversations between actors involved; training sessions and ICT support arranged; evaluation performed.                                 | Evaluation study in progress.                                                                                                                                | The service has been integrated into existing organisational structures.                                                                | L: Boston, USA.<br>P: High risk neonates <1500 grams.<br>T: Description of service, no outcomes at this stage.                                    |
| Ono and Lindsey (2004)[28] | Deficient access to health care for children with paediatric                                                                 | Tele-pediatrics network: real time specialist                                                      | Enhance access to specialist health care in rural areas.                        | Motivated and determined actors involved;                                                                                                | Harmonizing with an initiative to develop a                                                                                                                  | To overcome health care personnel's "techno-fear"                                                                                       | L: Honolulu, Hawaii and other islands in the Pacific.                                                                                             |

|                                 |                                                                                                        |                                                                                                            |                                                                                             |                                                                                                                     |                                                                                                  |                                                                                      |                                                                                                                                                                                                       |
|---------------------------------|--------------------------------------------------------------------------------------------------------|------------------------------------------------------------------------------------------------------------|---------------------------------------------------------------------------------------------|---------------------------------------------------------------------------------------------------------------------|--------------------------------------------------------------------------------------------------|--------------------------------------------------------------------------------------|-------------------------------------------------------------------------------------------------------------------------------------------------------------------------------------------------------|
|                                 | orthopaedic conditions or need for plastic surgery in the Islands in the Pacific Sea.                  | consultations.                                                                                             |                                                                                             | medical director and telemedicine coordinator appointed, networking towards the remote sites and funding providers. | comprehensive state wide telemedicine network in Hawaii                                          |                                                                                      | P: >240 consultations.<br>T: Description of service.                                                                                                                                                  |
| Moses et al. (1997) [29]        | High cost involved in transporting specialists in order to perform routine endoscopies in rural areas. | Tele-endoscopy; support rural general surgeons and gastro-enterologists in performing endoscopies locally. | Enhance accessibility to quality health care in rural areas.                                | Evaluation study performed.                                                                                         | Telemedical application as part of a state wide telenetwork; continuance of the evaluation.      | Remember the importance of essential and prospective evaluation of new applications. | L: Vermont, USA.<br>3 pilot studies; a) 30 patients – image quality/diagnostic concordance study.<br>b) Chart review, study of cost-effectiveness.<br>c) Interviews with 4 potential users (doctors). |
| Gulube and Wynchank (2001) [30] | Lack of health services in rural areas of South Africa.                                                | Tele-radiology, tele-ultrasound program; improve primary health care                                       | Mitigate perceived differences in quality of health care caused by former political regime. | Political, commercial, and scientific actors cooperate designing, coordinating, and                                 | Establishing a national telemedicine system; continuation of evaluation programs; guidelines for | Challenges regarding technical and organisational issues have been considered        | L: South Africa.<br>28 pilot sites.<br>P: 264 teleradiology sessions, 9 antenatal ultrasound consultations.                                                                                           |

|                           |                                                                                 |                                                                                                                                 |                                                                                                                         |                                                                           |                                                                                                                                                                              |                                                                          |                                                                                                                                                                                    |
|---------------------------|---------------------------------------------------------------------------------|---------------------------------------------------------------------------------------------------------------------------------|-------------------------------------------------------------------------------------------------------------------------|---------------------------------------------------------------------------|------------------------------------------------------------------------------------------------------------------------------------------------------------------------------|--------------------------------------------------------------------------|------------------------------------------------------------------------------------------------------------------------------------------------------------------------------------|
|                           |                                                                                 | services and health education.                                                                                                  |                                                                                                                         | implementing a telemedicine program; evaluation performed                 | use prepared                                                                                                                                                                 |                                                                          | T: Description of service.<br>Outcomes: reduction in patient transfers.                                                                                                            |
| Chan et al. (2001) [31]   | Need to Improve prenatal care in rural areas of Queensland.                     | Tele-ultrasound; improve access to prenatal care; reduce travelling time; improve access to medical education.                  | Reduce health care gap between urban and rural areas; increase access to specialist treatment.                          | Collaboration between promoters and users; evaluation performed.          | The telemedical application has become an integrated part of ordinary clinical practice.                                                                                     | Limitations to further diffusion of the application has been considered. | L: Queensland, Australia.<br>P: 71 patients + clinicians, It/technical staff, managers<br>T: Quantitative. Technical and clinical evaluation (satisfaction and diagnostic impact). |
| Lawton et al. (2004) [32] | Increase in waiting time for dermatology outpatient appointments in Nottingham. | Tele-dermatology; provide diagnosis efficiently, improve treatment and management of dermatological conditions in primary care. | Deliver modern patient-centred services in enhanced and accessible surroundings; working across traditional boundaries. | Involvement and commitment between actors involved; evaluation performed. | Telemedical application viewed as an integral part of the community medical service; establishment of a teledermatology team; treatment protocols and referral pathways into | n/a                                                                      | L: Nottingham, UK. A hospital dermatology department and 4 primary care trusts.<br>P: GP, nurses, patients.<br>T: Description of service.                                          |

|                            |                                                                                             |                                                                                                                                                            |                                                                                                                        |                                                                                                   |                                        |                                                                         |                                                                                                                                                                               |
|----------------------------|---------------------------------------------------------------------------------------------|------------------------------------------------------------------------------------------------------------------------------------------------------------|------------------------------------------------------------------------------------------------------------------------|---------------------------------------------------------------------------------------------------|----------------------------------------|-------------------------------------------------------------------------|-------------------------------------------------------------------------------------------------------------------------------------------------------------------------------|
|                            |                                                                                             |                                                                                                                                                            |                                                                                                                        |                                                                                                   | secondary care established.            |                                                                         |                                                                                                                                                                               |
| DiLieto et al. (2002) [33] | Need for increased specialised medical expertise to pregnant women in rural areas of Italy. | Tele-cardio-tocography: increase quality of care to pregnant and newborn; reduce pregnant women's need for stressful travelling and/or hospital admission. | Give near term pregnant women in rural areas the same access to high quality CTG examinations as women in urban areas. | Collaboration between promoters and users; local user resistance discussed; evaluation performed. | Guidelines for use established.        | Obstacles between different health care providers have been considered. | L: Naples, Italy, and 5 centres 15-30 km away.<br>P: 162 patients, medical/technical staff.<br>T: Description of service.<br>Outcomes: no of C-sections, users' satisfaction. |
| Lin et al. (2001)[34]      | Poorly distributed medical resources in rural areas of Taiwan.                              | Telemedicine system (primarily tele-radiology); reduce frequency of referrals; provide CME opportunities.                                                  | Improve medical services in rural areas.                                                                               | Evaluation accomplished; system adjusted to user requirements.                                    | Continuing development of technology.  | Further development of web-based telemedicine                           | L: Taiwan.<br>3 hospitals + local health care centre.<br>P: 1107 consultations.<br>T: Description of service.<br>Outcomes: change of diagnosis, transferrals, satisfaction.   |
| Urness (1999) [35]         | Deficient access to health care for patients with                                           | Tele-psychiatric service;                                                                                                                                  | Removal of geographic barriers to                                                                                      | Cooperation and commitment                                                                        | Dedicated administrative unit defined; | n/a                                                                     | L: Alberta, Canada. One major and 5 rural                                                                                                                                     |

|                       |                                                                                |                                                                                                                                                                                       |                                                                           |                                                                                                                                                                                 |                                                                                                    |                                                                                                   |                                                                                                                                                                                                                                     |
|-----------------------|--------------------------------------------------------------------------------|---------------------------------------------------------------------------------------------------------------------------------------------------------------------------------------|---------------------------------------------------------------------------|---------------------------------------------------------------------------------------------------------------------------------------------------------------------------------|----------------------------------------------------------------------------------------------------|---------------------------------------------------------------------------------------------------|-------------------------------------------------------------------------------------------------------------------------------------------------------------------------------------------------------------------------------------|
|                       | psychiatric disease in rural areas of Alberta.                                 | enhance access to specialist care; reduce travel time for patients and staff; reduce waiting time.                                                                                    | specialty mental health consultation.                                     | between actors involved regarding administration of the program and funding; training session and ICT support arranged; evaluation performed; gradual expansion of the program. | integration with ordinary service; equipment made available for other purposes; evaluation planed. |                                                                                                   | hospitals linked. P: 109 consultations. T: Description of service. Outcomes: acceptance/satisfaction. Per cent of consultations that are follow-ups.                                                                                |
| Doolittle (2001) [36] | Need for increased access to specialist health care in remote areas of Kansas. | Educational tool; provide access to specialist care and consultations (oncology, paediatrics); provide short response time for urgent cases; reduce travel time; increase recruitment | Increase access to specialist health care at geographically remote areas. | Telemedicine coordinator appointed; commitment and participation between actors involved; gradual expansion of program.                                                         | Goals and guidelines for use established; routines for financial support established.              | The successful parts of the service have been integrated into existing organisational structures. | L: Kansas, USA. University medical centre and >40 sites. P: Several programmes; 170 tele-oncology patients, >1000 school-based tele-paediatric consultations, etc. T: Description of service. Reports of rates of satisfaction from |

|                         |                                                                                                             |                                                                                                                                                                                                                   |                                                                             |                                                                                                                         |                                                                                                                            |                                                                                                   |                                                                                                                                                                                                                                                                              |
|-------------------------|-------------------------------------------------------------------------------------------------------------|-------------------------------------------------------------------------------------------------------------------------------------------------------------------------------------------------------------------|-----------------------------------------------------------------------------|-------------------------------------------------------------------------------------------------------------------------|----------------------------------------------------------------------------------------------------------------------------|---------------------------------------------------------------------------------------------------|------------------------------------------------------------------------------------------------------------------------------------------------------------------------------------------------------------------------------------------------------------------------------|
| Doolittle (2001) [36]   | Need for increased access to specialist health care in remote areas of Kansas.                              | Educational tool; provide access to specialist care and consultations (oncology, paediatrics); provide short response time for urgent cases; reduce travel time; increase recruitment and retention of local GPs. | Increase access to specialist health care at geographically remote areas.   | Telemedicine coordinator appointed; commitment and participation between actors involved; gradual expansion of program. | Goals and guidelines for use established; routines for financial support established.                                      | The successful parts of the service have been integrated into existing organisational structures. | L: Kansas, USA. University medical centre and >40 sites. P: Several programmes; 170 tele-oncology patients, >1000 school-based tele-paediatric consultations, etc. T: Description of service. Reports of rates of satisfaction from medical/nursing staff, patients/parents. |
| Chau and Hu (2004) [37] | Need to increase quality of diagnosis and treatment to patients with neurosurgical conditions in Hong Kong. | Telemedical application; neurosurgeons at an acute tertiary hospital provide remote consultations to physicians. at a regional general                                                                            | Achievement of vertical integration of patient care and management services | A motivated and determined clinical administrator and motivated surgeons.                                               | The telemedical application has become part of a Hong Kong-based telemedicine program; guidelines for use are established. | The service has been integrated into an accounting system.                                        | L: Hong-Kong P: 2-3 transmissions per day, including surgeons and technical staff. T: Qualitative, case-study, interviews with those involved.                                                                                                                               |

|                                 |                                                                                                                                |                                                                                                                                                 |                                                                                     |                                                                                                                   |                                                                                                |                                                                          |                                                                                                                                                                                |
|---------------------------------|--------------------------------------------------------------------------------------------------------------------------------|-------------------------------------------------------------------------------------------------------------------------------------------------|-------------------------------------------------------------------------------------|-------------------------------------------------------------------------------------------------------------------|------------------------------------------------------------------------------------------------|--------------------------------------------------------------------------|--------------------------------------------------------------------------------------------------------------------------------------------------------------------------------|
| Kavanagh and Hawker (2001) [39] | Need to improve the mental health services in rural South Australia.                                                           | Tele-psychiatry service; videoconferen ce consultations; provide effective and reliable psychiatric treatment to patients in distant locations. | Enhance access to quality health care in rural areas.                               | Continuous expansion and improvement of the tele-psychiatry service.                                              | Guidelines for use of the tele-psychiatry service established; management support established. | The service has been integrated into existing organisational structures. | L: Adelaide, Australia, and 48 peripheral sites. P: Ca 100 sessions/month. T: Description of service. Outcome: continuation of service.                                        |
| Johnson (2004) [43]             | A rural office of Vocational Rehabilitation offers limited services when working with clients who are deaf or hard of hearing. | Audio-video network; Improve overall employment outcomes for clients who are deaf and hard of hearing.                                          | Mitigate perceived regional differences in quality of services caused by distances. | Building alliances and partnership between actors involved; planning meetings accomplished; evaluation performed. | Continuance of the evaluation.                                                                 | A telemedicine state program is established.                             | L: Utah, USA. 4 vocational rehabilitation centres + 10 postsecondary locations. P: Staff, sign-language interpreters. T: Description of service, outcome: users' satisfaction. |
| Schneider (2004)[44]            | High rate of re-hospitalization in relation to congestive heart failure; loss of                                               | Home-monitoring; transferring vital signs to a home care                                                                                        | Improve patient care; reduce the number of re-hospitalizations; decrease            | Cooperation between actors involved when                                                                          | There is a dedicated pool of staff operating the system.                                       | n/a                                                                      | L: Pennsylvania, USA. P: unknown number of patients.                                                                                                                           |

|  |                                               |         |                   |                                                                                              |  |  |                                                                                                                 |
|--|-----------------------------------------------|---------|-------------------|----------------------------------------------------------------------------------------------|--|--|-----------------------------------------------------------------------------------------------------------------|
|  | revenue for home care agencies and hospitals. | centre. | financial losses. | choosing application; motivation of staff; training session for staff and patients arranged. |  |  | T: Description of service.<br>Outcomes: reduction in number of home nursing visits and rehospitalisation rates. |
|--|-----------------------------------------------|---------|-------------------|----------------------------------------------------------------------------------------------|--|--|-----------------------------------------------------------------------------------------------------------------|
